# Supplementary material for: Can rifts alter ocean dynamics beneath ice shelves?
Source: Copernicus journal article supplement (doi:10.5194/tc-17-2261-2023), 2023-06-07
Supplement: Supplementary file 1 [file tc-17-2261-2023-supplement.zip]

Archive with 2 entries (2 files):
- Animation.mp4
- tc-17-2261-2023-supplement-title-page.pdf
