# Supplementary material for: Can rifts alter ocean dynamics beneath ice shelves?
Source: Copernicus journal article supplement (doi:10.5194/tc-17-2261-2023), 2023-06-07
Supplement: Supplementary file 1 [file tc-17-2261-2023-supplement.zip › tc-17-2261-2023-supplement-title-page.pdf]

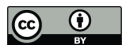

## *Supplement of*

# **Can rifts alter ocean dynamics beneath ice shelves?**

**Mattia Poinelli et al.**

*Correspondence to:* Mattia Poinelli (mattia.poinelli@jpl.nasa.gov)

- tc-17-2261-2023-supplement-title-page.pdf
- Animation.mp4

The copyright of individual parts of the supplement might differ from the article licence.
